# Supplementary material for: Computational Models on Pathological Redox Signalling Driven by Pregnancy: A Review
Source: MDPI journal article supplement (doi:10.3390/antiox11030585), 2022-03-18
Supplement: s1 [file s1]

**Table of experimental methods to assess redox status.**

| Method/Main Component                              | Input or general Information                                                                                                                                                              | Output                                                      | Challenge                                                                                                                                 | Reference |
|----------------------------------------------------|-------------------------------------------------------------------------------------------------------------------------------------------------------------------------------------------|-------------------------------------------------------------|-------------------------------------------------------------------------------------------------------------------------------------------|-----------|
| <b>ROS</b>                                         |                                                                                                                                                                                           |                                                             |                                                                                                                                           |           |
| Ferricytochrome c reduction to ferrocycytochrome c | ferricytochrome c reduction to ferrocycytochrome c<br>Absorbance based                                                                                                                    | Indicator for ROS formation rate                            | Outdated - indirect + less sensitive compared to current methods                                                                          | (19)      |
| Lucigenin (redox cycling)<br>Coelenterazine        | Chemilumenscent reactions to determine ROS production                                                                                                                                     | Indicator for ROS formation                                 | Lucinogen - not ideal for quantitative measures<br>Coelenterazine does not redox cycle - not specific to ROS alone - also to peroxnitrite | (10)      |
| Hydrocyanine dyes                                  | Fluorogenic sensors for ROS and hydroxyl radicals, functions both <i>in vitro</i> and <i>in vivo</i>                                                                                      | Indicator for ROS and hydroxyl radicals                     | High auto-oxidation<br>Low strokes shift<br>Low solubility                                                                                | (16)      |
| Dihydroethidium                                    | Fluorescence until oxidized by ROS and RNS<br><br>Spectroscopy                                                                                                                            | Marker product of ROS and hydroethidine                     | Differentiation between ROS and RNS oxidative function not possible - only semi quantitative (if conditions are compared)                 | (36)      |
| ROS                                                | <ul style="list-style-type: none"> <li>• redox-sensitive fluorophores</li> <li>• fluorescent reporters</li> <li>• electron paramagnetic resonance spectroscopy</li> <li>• HPLC</li> </ul> | ROS quantity                                                |                                                                                                                                           | (32)      |
| <b>Mitochondrial ROS</b>                           |                                                                                                                                                                                           |                                                             |                                                                                                                                           |           |
| MitoSOX™ assay                                     | Cationic derivative of dihydroethidium<br>- permeates live cells and targets mitochondria<br>- In live cells - fluorescence                                                               | Mitochondrial ROS                                           | Cannot differentiate between different ROS species                                                                                        | (15)      |
| CellROX®                                           | Cell-permeant dyes that are weakly fluorescent in reduced state and exhibit stable fluorescence upon oxidation by ROS                                                                     | Dependent on specific CellROX type either mitochondrial ROS | Conflicts with H <sub>2</sub> O <sub>2</sub> responses                                                                                    | (33)      |
| Mitochondrial membrane potential indicator for OS  | In vitro method<br>Usually coupled with oxygen consumption rate<br>Time-series TMRM fluorescence measurement                                                                              | Indicator for ROS mediated cell injury                      |                                                                                                                                           | (31)      |
| <b>H<sub>2</sub>O<sub>2</sub> detection</b>        |                                                                                                                                                                                           |                                                             |                                                                                                                                           |           |

|                                                                                    |                                                                                                                                                                                                                             |                                                    |                                                                                                                                                                                                                                |      |
|------------------------------------------------------------------------------------|-----------------------------------------------------------------------------------------------------------------------------------------------------------------------------------------------------------------------------|----------------------------------------------------|--------------------------------------------------------------------------------------------------------------------------------------------------------------------------------------------------------------------------------|------|
| Amplex ® Red                                                                       | Amplex Red is oxidized by H <sub>2</sub> O in presence of HRP and then converted to resorufin<br>Detection colorimetric or fluorescence                                                                                     | H <sub>2</sub> O <sub>2</sub> detection            | Highly sensitive to light exposure and then less sensitive to H <sub>2</sub> O <sub>2</sub>                                                                                                                                    | (35) |
| Homovanillic acid                                                                  | Oxidizes with H <sub>2</sub> O <sub>2</sub> through HRP<br>Detection via fluorescence                                                                                                                                       | H <sub>2</sub> O <sub>2</sub> detection            | Sensitive to background signal especially when polystyrene microplates are used                                                                                                                                                | (23) |
| TMB                                                                                | Oxidizes with H <sub>2</sub> O <sub>2</sub> through HRP                                                                                                                                                                     | H <sub>2</sub> O <sub>2</sub> detection            | Less sensitive, but cheaper<br>General drawback with HRP catalysis - thiols skew the result                                                                                                                                    | (34) |
| H2DCF                                                                              | Is reduced to DCF by H <sub>2</sub> O <sub>2</sub> (and other ROS)<br>Detection via fluorescence                                                                                                                            | H <sub>2</sub> O <sub>2</sub> detection            | Originally used for H <sub>2</sub> O <sub>2</sub> detection until it was shown not to be specific to H <sub>2</sub> O <sub>2</sub><br><br>H <sub>2</sub> O <sub>2</sub> specific extensions: Peroxy Green1 and Peroxy Crimson1 | (20) |
| <b>Nitric Oxide</b>                                                                |                                                                                                                                                                                                                             |                                                    |                                                                                                                                                                                                                                |      |
| Nitrate and nitrite<br><br>Follow up with nitrite only assay<br><br>“Griess assay” | NO <sub>3</sub> reduction to NO <sub>2</sub> by nitrate reductase. Nitrite forms nitrous acid in presence of hydrogen ions<br>- nitrous acid reacts with sulfanilamide and produces diazonium ion<br>Detection colorimetric | Indirect NO detection                              | Indirect and unspecific                                                                                                                                                                                                        | (11) |
| NADH and NADPH                                                                     | Detection via cellular autofluorescence + FLIM                                                                                                                                                                              | NAD(P)H redox state (separation of NADH and NADPH) |                                                                                                                                                                                                                                | (3)  |
| Fluorometric probe: DAF-2                                                          | DAF-2 reacts with either N <sub>2</sub> O <sub>3</sub> or NO <sub>2</sub> to form highly-fluorescent triazole                                                                                                               | Detection of NO and RNS                            | Susceptible to experimental artifacts (increased fluorescence by Ca <sup>2+</sup> ions, incident light and non-neutral pH).<br>Cross reactivity with peroxynitrite, nitroxyl, and ascorbic acid                                | (13) |
| Fluorometric probe: DAN                                                            | DAN reacts with nitrous acid and forms 2,3 naphthotriazole<br>Detection via fluorescence<br>Works both <i>in vitro</i> and <i>in vivo</i>                                                                                   | Indicator of NO formation                          | Not able to inform about area of NO production                                                                                                                                                                                 | (4)  |
| Bioassays cGMP level<br><br>Vessel relaxation                                      | Details stated in method title                                                                                                                                                                                              | Measurement of downstream actions of NO            | Indirect measurement<br>Do not adjust for other confounding factors                                                                                                                                                            | (21) |

|                                                                                                                                                                                                                                                               |                                                                                                                                                                                |                                              |                                                                           |      |
|---------------------------------------------------------------------------------------------------------------------------------------------------------------------------------------------------------------------------------------------------------------|--------------------------------------------------------------------------------------------------------------------------------------------------------------------------------|----------------------------------------------|---------------------------------------------------------------------------|------|
| Inhibition of platelet aggregation                                                                                                                                                                                                                            |                                                                                                                                                                                |                                              |                                                                           |      |
| <b>Glutathione</b>                                                                                                                                                                                                                                            |                                                                                                                                                                                |                                              |                                                                           |      |
| HPLC                                                                                                                                                                                                                                                          | Uses iodoacetic acid to modify thiols and 1-fluoro-2,4-dinitrobenzene to add a chromophore to the amino groups, allowing direct measurement of GSH, GSSG, Cys, CySS, and CySSG | GSH to GSSG ratio                            | Not sensitive enough to measure GSSG in plasma                            | (14) |
| <ul style="list-style-type: none"> <li>• Capillary electrophoresis</li> <li>• Free zone CE</li> <li>• Micellar electrokinetic chromatography</li> <li>• Isotachopheresis</li> <li>• Capillary gel electrophoresis</li> <li>• electrochromatography</li> </ul> | Electrophoretic separation by application of high electric field to sample in capillary - background electrolyte (BGE)                                                         | GSH to GSSG ratio                            | Limited analyte loading leads to diminished sensitivity                   | (6)  |
| Microplates                                                                                                                                                                                                                                                   |                                                                                                                                                                                | GSH to GSSG ratio                            | Prone to human error                                                      | (2)  |
| Luciferase assay (example Promega)                                                                                                                                                                                                                            | Luciferin derivative glutathione s-transferase - GSH amount proportional to luminescent signal when luciferase is added                                                        | GSH quantity                                 | Prone to human error                                                      | (25) |
| Colorimetric assay:                                                                                                                                                                                                                                           | GSH + DTNB + glutathione reductase                                                                                                                                             | Reduced GSH quantity                         | Prone to human error                                                      | (12) |
| Monobromobimane                                                                                                                                                                                                                                               | Monobromobimane and monochlorobimane react with low molecular weight thiols (incl glutathione) and form fluorescent adducts                                                    | GSH ratio before and after chemical reaction | Monochlorobimane more thiol selective however, accumulates in the nucleus | (17) |
| ThiolTracker Violet                                                                                                                                                                                                                                           | Reacts with reduced thiols in intact cells → follow up flow cytometry and fluorescence microscopy                                                                              | Glutathione detection                        | Measures thiols in general, GSH is approximately measured                 | (18) |
| Lipid peroxidation                                                                                                                                                                                                                                            |                                                                                                                                                                                |                                              |                                                                           |      |
| MDA                                                                                                                                                                                                                                                           | Reaction of membrane unsaturated fatty acids with free radicals generates lipid peroxides - MDA and TBA adduct can be measured                                                 | TBA                                          | Highly sensitive but not specific to MDA                                  | (26) |

|                                   |                                                                                                                                                                                                                                                   |                                                                                                                                                                                      |                                                                                                                                                                                                                  |      |
|-----------------------------------|---------------------------------------------------------------------------------------------------------------------------------------------------------------------------------------------------------------------------------------------------|--------------------------------------------------------------------------------------------------------------------------------------------------------------------------------------|------------------------------------------------------------------------------------------------------------------------------------------------------------------------------------------------------------------|------|
| IsoP Elisa                        | Stated in method title                                                                                                                                                                                                                            | IsoP quantity                                                                                                                                                                        | Requires purification of samples                                                                                                                                                                                 | (22) |
| IsoP GC/MS<br><i>In vivo</i>      | Plasma or urinary samples<br>GC/MS                                                                                                                                                                                                                | IsoP quantity                                                                                                                                                                        | High cost                                                                                                                                                                                                        | (28) |
| BODIPY®<br>Image-IT®              | Live cells - fluorescent-Mass spectrometry                                                                                                                                                                                                        | IsoP ratio                                                                                                                                                                           | Sensitive to photo bleaching in high-intensity illumination conditions                                                                                                                                           | (8)  |
| LAA Click-iT®<br>Alexa Fluor ®    | LAA incorporates into cellular membrane and is oxidized in response to lipid peroxidation - LAA then produces HPODE that modifies surrounding proteins<br>- the resulting alkyne-containing proteins can be detected using AlexaFluor or Click-iT | Lipid peroxidation reporter                                                                                                                                                          | Cells must be fixed                                                                                                                                                                                              | (37) |
| •HPLC<br><br>•HPLC-MS             | Used to separate lipid mixtures in fractions, based on molecular weight and polarity..<br><br>Gold standard for quantification of known biomarkers                                                                                                | <ul style="list-style-type: none"> <li>• Lipid peroxidation biomarkers</li> <li>• Specific identification of unknown peroxidation derivatives of large nonvolatile lipids</li> </ul> | <p>In isolation, requires known standard.</p> <p>Quantification can be imprecise if the molecule of interest has similar molecular weight of other molecules in solution</p> <p>High financial and time cost</p> | (24) |
| •GC<br>•GC-MS                     | Used to separate lipid mixtures in fractions, based on their volatility.<br><br>Followed by MS allows identification of unknown peroxidation products                                                                                             | <ul style="list-style-type: none"> <li>• Lipid peroxidation biomarkers</li> <li>• Specific identification of unknown peroxidation derivatives</li> </ul>                             | <p>Requires high temperatures</p> <p>Quantification can be imprecise if the molecule of interest has similar molecular weight of other molecules in solution</p> <p>High financial and time cost</p>             | (9)  |
| <b>Redox Status</b>               |                                                                                                                                                                                                                                                   |                                                                                                                                                                                      |                                                                                                                                                                                                                  |      |
| Genetically encoded sensors       | <i>In vivo</i><br>Change fluorescence in response to alteration in redox state i.e. roGFP - linked to Orp1 which forms disulfides after reacting with H <sub>2</sub> O <sub>2</sub>                                                               | GSH redox potential                                                                                                                                                                  | Monitoring redox changes in multiple compartments remains difficult                                                                                                                                              | (27) |
| 2D electrophoresis<br>PAGE (DIGE) | Cysteine-labeling                                                                                                                                                                                                                                 | Identification of redox sensitive proteins specific to user defined conditions                                                                                                       | High cost                                                                                                                                                                                                        | (7)  |

|                                                                   |                                                                                                                                                                                                                                          |                                                                                                          |                                                                        |      |
|-------------------------------------------------------------------|------------------------------------------------------------------------------------------------------------------------------------------------------------------------------------------------------------------------------------------|----------------------------------------------------------------------------------------------------------|------------------------------------------------------------------------|------|
| DNPH                                                              | DNPH reacts with all protein carbonyls                                                                                                                                                                                                   | Protein carbonyl content                                                                                 | Interacts with heme groups                                             | (1)  |
| OxiBlot                                                           | <ul style="list-style-type: none"> <li>• DNPH reacts with protein carbonyls</li> <li>• Followed by separation of oxidatively modified proteins by electrophoresis</li> <li>• Followed by westernblot with anti-DNP antibodies</li> </ul> | Protein carbonyl content                                                                                 | Time consuming                                                         | (29) |
| 8-hydroxy-2' - deoxyguanosine                                     | Detection methods: <ul style="list-style-type: none"> <li>• HPLC</li> <li>• GC-MS</li> <li>• HPLC tandem</li> <li>• ELISA</li> </ul>                                                                                                     | Indicator for DNA damage caused by OS                                                                    | High cost and low throughput                                           | (30) |
| <i>In vivo</i> Measurements of Ca <sup>2+</sup> , pH, redox state | <ul style="list-style-type: none"> <li>• Genetically encoded fluorescent reporters</li> <li>• Two photon microscopy</li> <li>• nuclear magnetic resonance</li> </ul>                                                                     | <ul style="list-style-type: none"> <li>• Ca<sup>2+</sup></li> <li>• pH</li> <li>• redox state</li> </ul> | High expertise required<br>Specialized equipment required<br>High cost | (5)  |

Table of experimental methods to assess redox status, sorted by output. Included are the general name the method is referred to, as well as keywords describing the method and/or reactions the method is based on, outcome information, challenges and a reference referring to either a publication describing the method, or a product link. Methods that can be used for several biomarkers are only explained once.

| Abbreviations                 |                                            |                               |                                                           |
|-------------------------------|--------------------------------------------|-------------------------------|-----------------------------------------------------------|
| DAF-2                         | : Diaminofluorescein                       | IsoP                          | : Isoprostane                                             |
| DAN                           | : 2, 3-diaminonaphthalene                  | LAA                           | : Linoleamide alkyne                                      |
| DNPH                          | : 2,4-dinitrophenylhydrazine               | MDA                           | : Malondialdehyde                                         |
| DTNB                          | : 5,5 dithio-bis-nitrobenzoic acid         | N <sub>2</sub> O <sub>3</sub> | : Dinitrogen trioxide                                     |
| GC/MS                         | : Gas chromatography–mass spectrometry     | NADH                          | : Nicotinamide adenine dinucleotide hydrogen              |
| GSH                           | : Glutathione                              | NADPH                         | : Nicotinamide Adenine Dinucleotide Phosphate Hydrogen    |
| GSSH                          | : Oxidized glutathione                     | NO <sub>2</sub>               | : Nitrogen Dioxide                                        |
| H2DCF                         | : 2,7-dichlorodihydrofluorescein diacetate | NO <sub>3</sub>               | : Nitrate                                                 |
| H <sub>2</sub> O <sub>2</sub> | : Hydrogenperoxyde                         | roGFP                         | : Reduction-oxidation sensitive green fluorescent protein |
| HPODE                         | : 3-hydroperoxyoctadecadienoic acid        | TMB                           | : Tetramethylbenzidine                                    |

## Bibliography:

1. Alomari, E, Bruno, S, Ronda, L, Paredi, G, Bettati, S, and Mozzarelli, A. Protein carbonylation detection methods: A comparison. *Data Br.* Elsevier, 2018;19:2215–20.
2. Baker, MA, Cerniglia, GJ, and Zaman, A. Microtiter plate assay for the measurement of glutathione and glutathione disulfide in large numbers of biological samples. *Anal Biochem.* 1990;190:360–5.
3. Blacker, TS, and Duchen, MR. Investigating mitochondrial redox state using NADH and NADPH autofluorescence. *Free Radic Biol Med.* Elsevier, 2016;100:53.
4. Bowman, LAH, Mclean, S, Poole, RK, and Fukuto, JM. The Diversity of Microbial Responses to Nitric Oxide and Agents of Nitrosative Stress: Close Cousins but Not Identical Twins. *Adv Microb Physiol.* 2011;59:135–219.
5. Breckwoldt, M, Pfister, F, Bradley, P, Marinković, P, Williams, P, Brill, M, et al. Multiparametric optical analysis of mitochondrial redox signals during neuronal physiology and pathology in vivo. *Nat Med.* Nat Med, 2014;20:555–60.
6. Camera, E, and Picardo, M. Analytical methods to investigate glutathione and related compounds in biological and pathological processes. *J. Chromatogr. B Anal. Technol. Biomed. Life Sci.* Elsevier, 2002;pp. 181–206.
7. Chan, HL, Sinclair, J, and Timms, JF. Proteomic analysis of redox-dependent changes using cysteine-labeling 2D DIGE. *Methods Mol Biol.* 2012;854:113–28.
8. Drummen, G, Gadella, B, Post, J, and Brouwers, J. Mass spectrometric characterization of the oxidation of the fluorescent lipid peroxidation reporter molecule C11-BODIPY(581/591). *Free Radic Biol Med.* Free Radic Biol Med, 2004;36:1635–44.
9. Fisk, HL, West, AL, Childs, CE, Burdige, GC, and Calder, PC. The Use of Gas Chromatography to Analyze Compositional Changes of Fatty Acids in Rat Liver Tissue during Pregnancy. *J Vis Exp.* MyJoVE Corporation, 2014;51445.
10. Freeman, BA, Tarpey, MM, White, CR, Suarez, E, Richardson, G, and Radi, R. Chemiluminescent Detection of Oxidants in Vascular Tissue: Lucigenin But Not. *Circ Res Circ Res.* 1999;
11. Green, L, Wagner, D, Glogowski, J, Skipper, P, Wishnok, J, and Tannenbaum, S. Analysis of nitrate, nitrite, and [15N]nitrate in biological fluids. *Anal Biochem.* Anal Biochem, 1982;126:131–8.
12. Hedley, DW. Flow Cytometric Assays of Anticancer Drug Resistance. *Ann N Y Acad Sci.* 1993;677:341–53.
13. Itoh, Y, Ma, FH, Hoshi, H, Oka, M, Noda, K, Ukai, Y, et al. Determination and Bioimaging Method for Nitric Oxide in Biological Specimens by Diaminofluorescein Fluorometry. *Anal Biochem.* Academic Press, 2000;287:203–9.
14. Jones, DP. Redox potential of GSH/GSSG couple: Assay and biological significance. *Methods Enzymol.* Academic Press Inc., 2002;348:93–112.
15. Kauffman, ME, Kauffman, MK, Traore, K, Zhu, H, Trush, MA, Jia, Z, et al. MitoSOX-Based Flow Cytometry for Detecting Mitochondrial ROS. *React Oxyg species (Apex, NC).* NIH Public Access, 2016;2:361.
16. Kundu, K, Knight, S, Willett, N, Lee, S, Taylor, W, and Murthy, N. Hydrocyanines: a class of fluorescent sensors that can image reactive oxygen species in cell culture, tissue, and in vivo. *Angew Chem Int Ed Engl.* Angew Chem Int Ed Engl, 2009;48:299–303.
17. Machado, MD, and Soares, E V. Assessment of cellular reduced glutathione content in *Pseudokirchneriella subcapitata* using monochlorobimane. *J Appl Phycol.* 2012;24:1509–16.
18. Mandavilli, B, and Janes, M. Detection of intracellular glutathione using ThiolTracker violet stain and fluorescence microscopy. *Curr Protoc Cytom.* Curr Protoc Cytom, 2010;Chapter 9:
19. McCord, JM, and Fridovich, I. Superoxide Dismutase. *J Biol Chem.* Elsevier, 1969;244:6049–55.
20. Miller, E, Tulyathan, O, Isacoff, E, and Chang, C. Molecular imaging of hydrogen peroxide produced for cell signaling. *Nat Chem Biol.* Nat Chem Biol, 2007;3:263–7.
21. Möller, MN, Rios, N, Trujillo, M, Radi, R, Denicola, A, and Alvarez, B. Detection and quantification of nitric oxide-derived oxidants in biological systems. *J Biol Chem.* 2019;294:14776–802.
22. Morrow, JD, Hill, KE, Burk, RF, Nammour, TM, Badr, KF, Roberts, LJ, et al. A series of prostaglandin F<sub>2</sub>-like compounds are produced in vivo in humans by a non-cyclooxygenase, free radical-catalyzed mechanism. *Proc Natl Acad Sci U S A.* National Academy of Sciences, 1990;87:9383.

23. Paital, B. A Modified Fluorimetric Method for Determination of Hydrogen Peroxide Using Homovanillic Acid Oxidation Principle. *Biomed Res Int*. Hindawi Limited, 2014;2014:.
24. Patton, GM, Fasulo, JM, and Robins, SJ. Analysis of lipids by high performance liquid chromatography: Part I. *J Nutr Biochem*. Elsevier, 1990;1:493–500.
25. Promega. GSH-Glo™ Glutathione Assay Instruc ons for Use of Products V6911 and V6912 [Internet].
26. Pryor, WA, Stanley, JP, and Blair, E. Autoxidation of polyunsaturated fatty acids: II. A suggested mechanism for the formation of TBA-reactive materials from prostaglandin-like endoperoxides. *Lipids*. Springer-Verlag, 1976;11:370–9.
27. Ren, W, and Ai, H-W. Genetically Encoded Fluorescent Redox Probes. *Sensors (Basel)*. Multidisciplinary Digital Publishing Institute (MDPI), 2013;13:15422.
28. Roberts, LJ, and Morrow, JD. Measurement of F2-isoprostanes as an index of oxidative stress in vivo. *Free Radic Biol Med*. Pergamon, 2000;28:505–13.
29. Stankowski, JN, Codreanu, SG, Liebler, DC, and McLaughlin, B. Analysis of Protein Targets by Oxidative Stress Using the OxyBlot and Biotin–Avidin-Capture Methodology. *Neuromethods*. Humana Press, 2011;56:365–81.
30. Valavanidis, A, Vlachogianni, T, and Fiotakis, C. 8-hydroxy-2' -deoxyguanosine (8-OHdG): A critical biomarker of oxidative stress and carcinogenesis. *J Environ Sci Health C Environ Carcinog Ecotoxicol Rev*. *J Environ Sci Health C Environ Carcinog Ecotoxicol Rev*, 2009;27:120–39.
31. Ward, M, Rego, A, Frenguelli, B, and Nicholls, D. Mitochondrial membrane potential and glutamate excitotoxicity in cultured cerebellar granule cells. *J Neurosci*. *J Neurosci*, 2000;20:7208–19.
32. Woolley, J, Stanicka, J, and Cotter, T. Recent advances in reactive oxygen species measurement in biological systems. *Trends Biochem Sci*. *Trends Biochem Sci*, 2013;38:556–65.
33. Yokoyama, C, Sueyoshi, Y, Ema, M, Mori, Y, Takaishi, K, and Hisatomi, H. Induction of oxidative stress by anticancer drugs in the presence and absence of cells. *Oncol Lett*. Spandidos Publications, 2017;14:6066–70.
34. Yuye Chen, Qingmei Zhong, Yilin Wang, Chunling Yuan, Xiu Qin, and Yuanjin Xu. Colorimetric detection of hydrogen peroxide and glucose by exploiting the peroxidase-like activity of papain. *RSC Adv*. Royal Society of Chemistry, 2019;9:16566–70.
35. Zhao, B, Summers, FA, and Mason, RP. Photooxidation of Amplex Red to resorufin: implications of exposing the Amplex Red assay to light. *Free Radic Biol Med*. NIH Public Access, 2012;53:1080.
36. Zielonka, J, Vasquez-Vivar, J, and Kalyanaraman, B. Detection of 2-hydroxyethidium in cellular systems: a unique marker product of superoxide and hydroethidine. *Nat Protoc* 2008 31. *Nature Publishing Group*, 2007;3:8–21.
37. Click-iT™ Lipid Peroxidation Imaging Kit - Alexa Fluor™ 488 [Internet]. Available from: <https://www.thermofisher.com/order/catalog/product/C10446#/C10446>.
